# Supplementary material for: The transporters SLC35A1 and SLC30A1 play opposite roles in cell survival upon VSV virus infection
Source: PubMed Central journal article supplement (PMC6639343; doi:10.1038/s41598-019-46952-9), 2019-07-18
Supplement: 41598_2019_46952_MOESM1_ESM.pdf [file 41598_2019_46952_MOESM1_ESM.pdf]

## SUPPLEMENTARY INFORMATION

The transporters SLC35A1 and SLC30A1 play opposite roles in cell survival upon VSV virus infection

Anna Moskovskich<sup>1</sup>, Ulrich Goldmann<sup>1</sup>, Felix Kartnig<sup>1</sup>, Sabrina Lindinger<sup>1</sup>, Justyna Konecka<sup>1</sup>, Giuseppe Fiume<sup>1</sup>, Enrico Girardi<sup>1\*</sup>, Giulio Superti-Furga<sup>1,2\*</sup>

<sup>1</sup> CeMM Research Center for Molecular Medicine of the Austrian Academy of Sciences, 1090 Vienna, Austria

<sup>2</sup> Center for Physiology and Pharmacology, Medical University of Vienna, 1090 Vienna, Austria

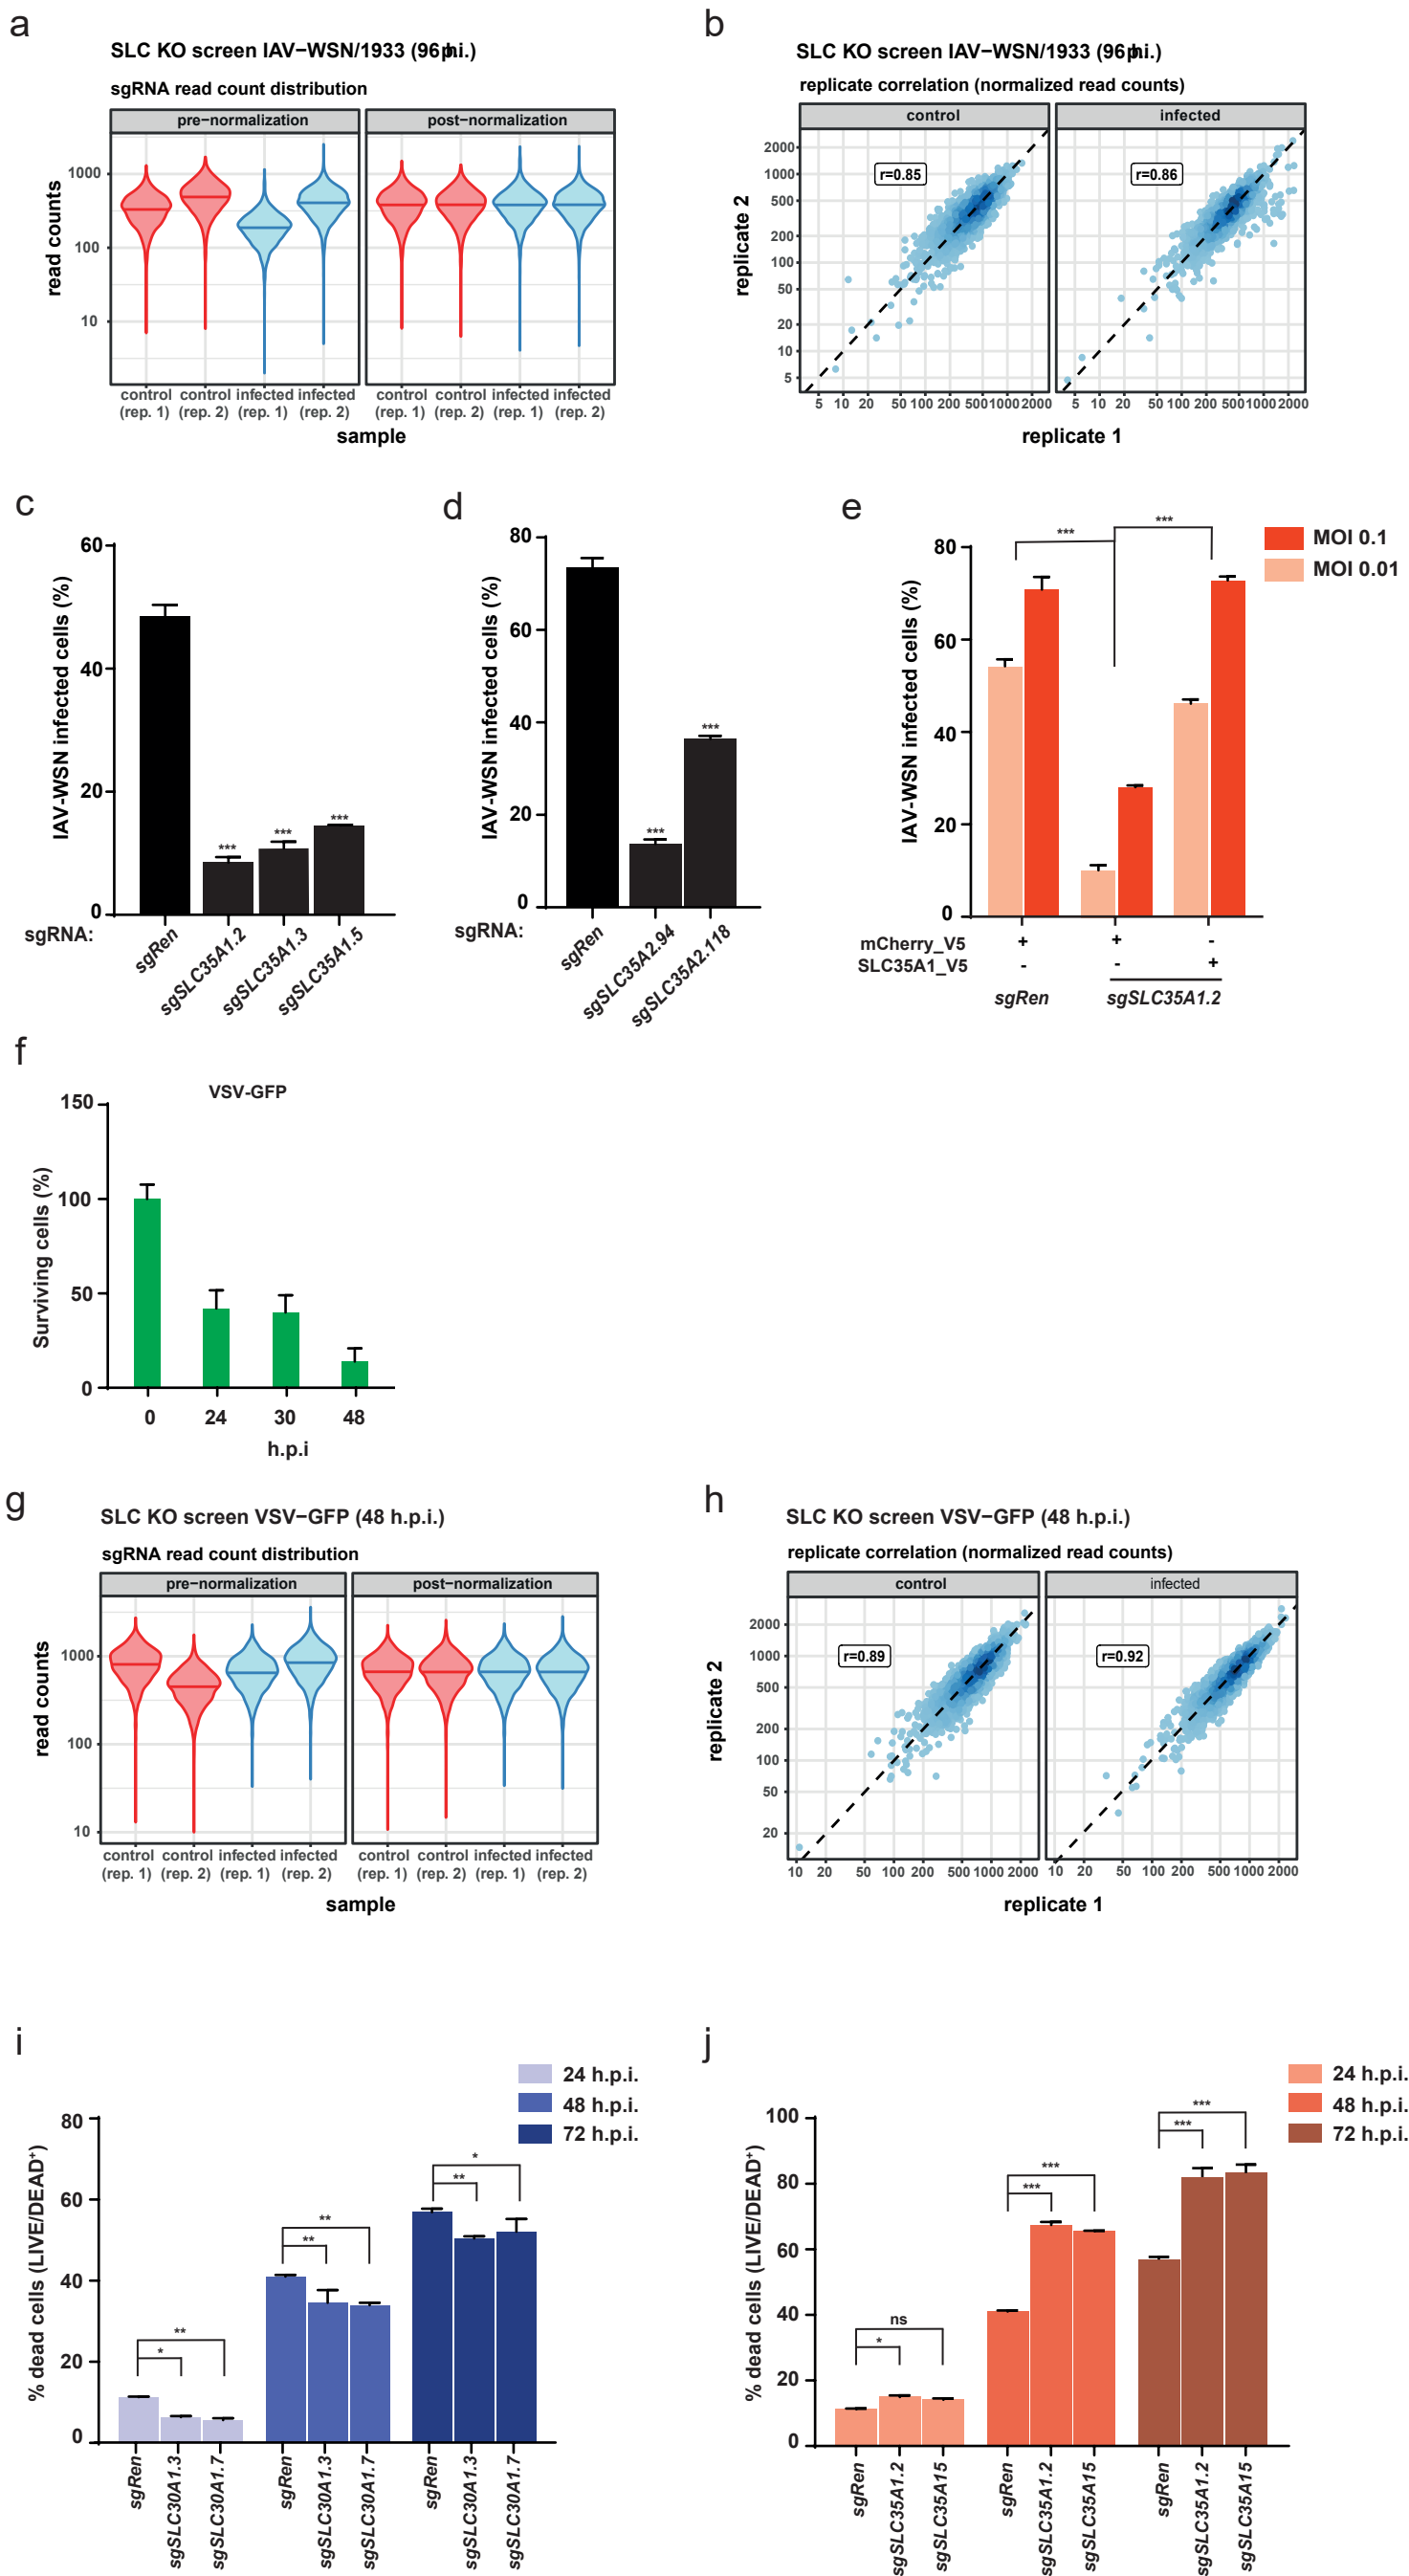



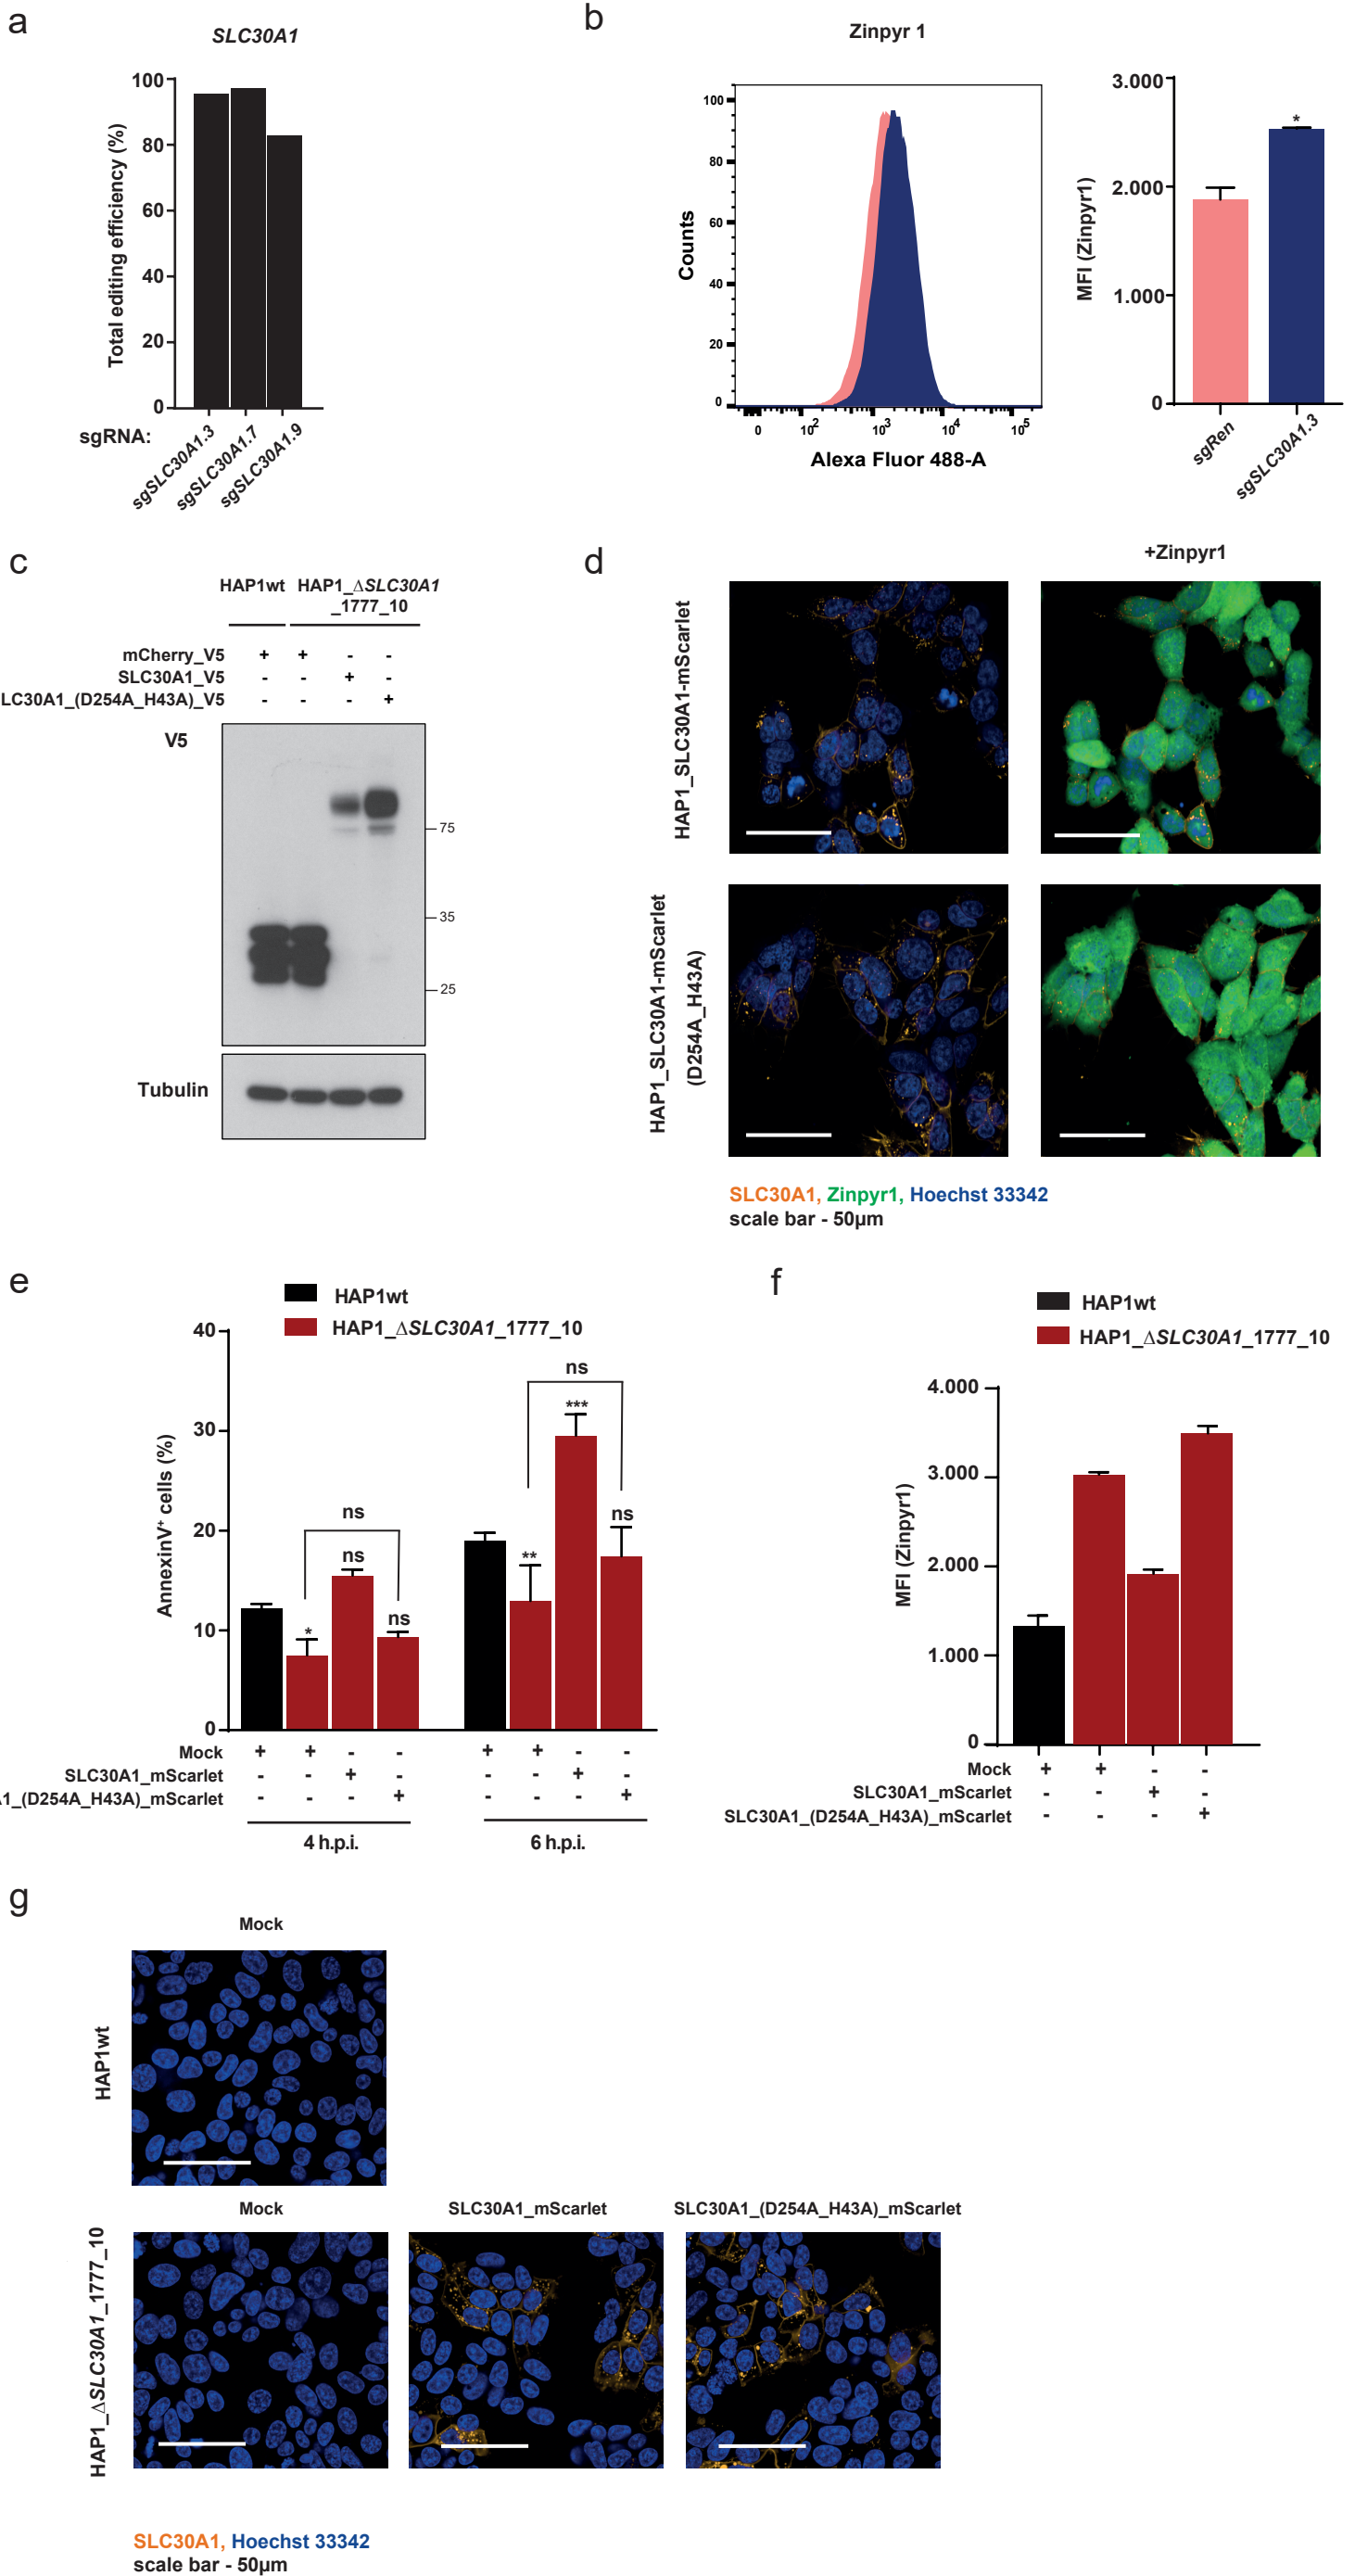

a

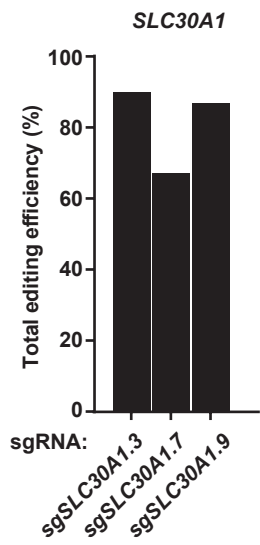

b

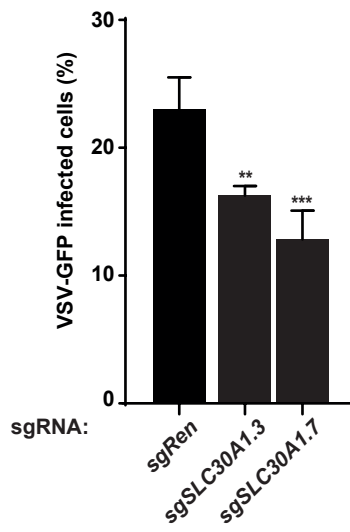

c

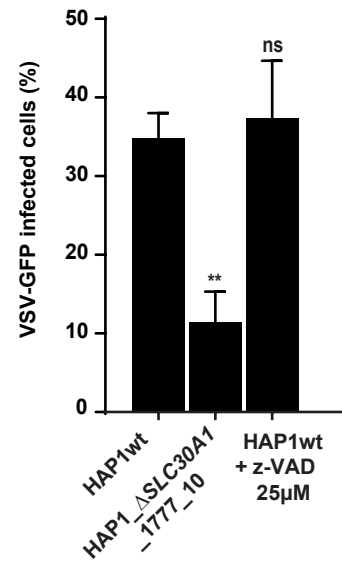

d

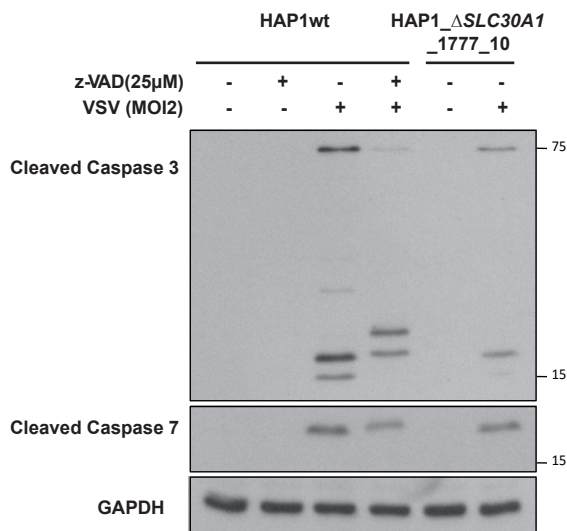

e

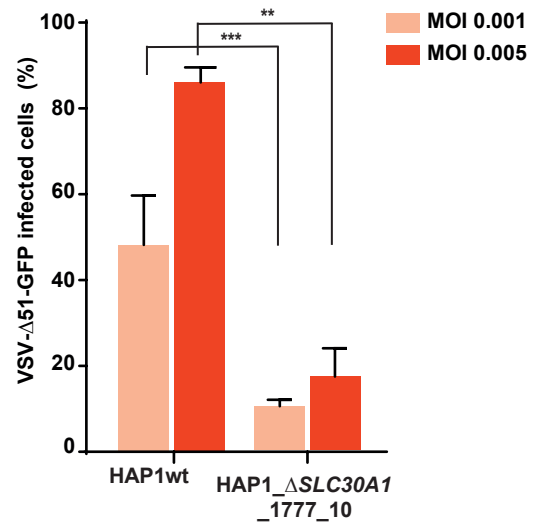

a

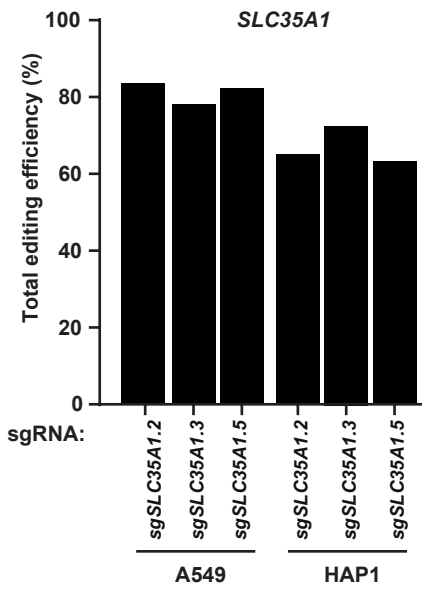

b

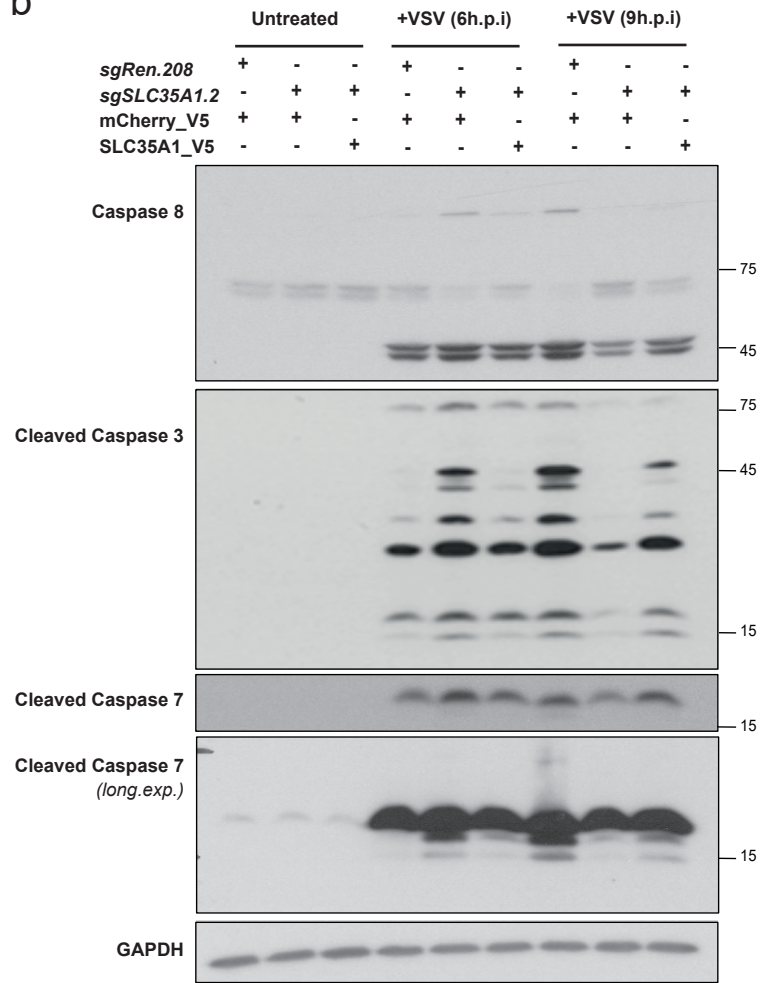

c

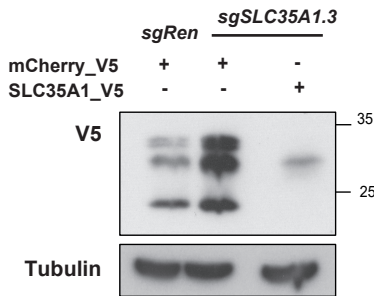

d

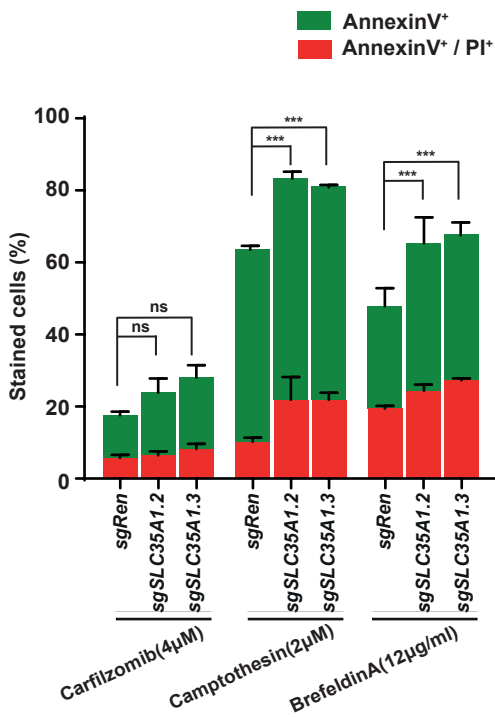

e

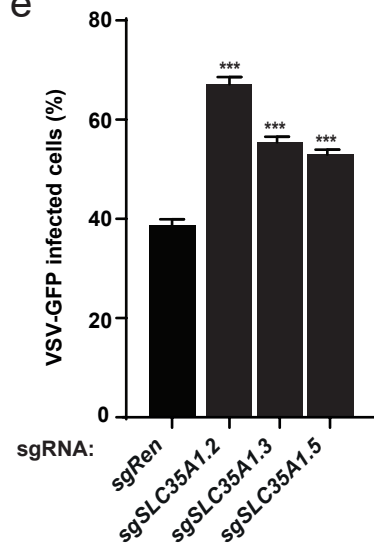

Full length immunoblots from Fig 2b

Caspase 9

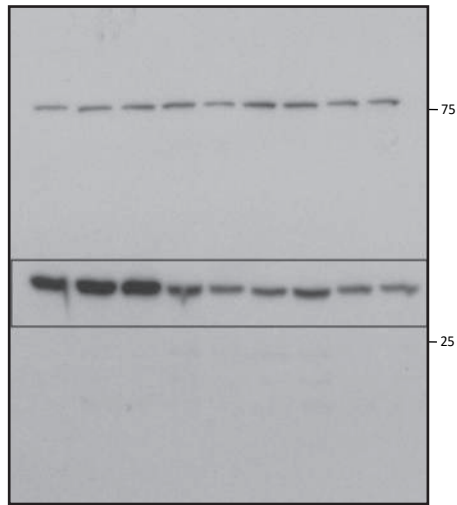

Caspase 9  
(long. exp.)

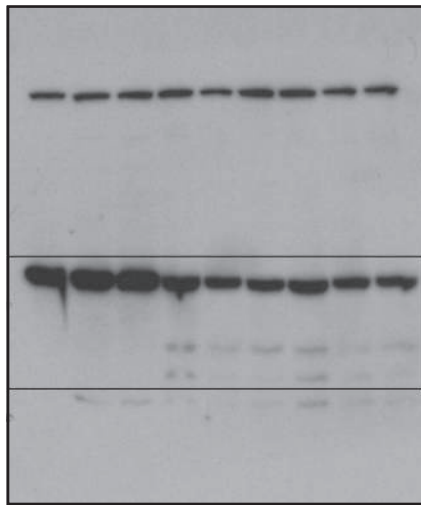

Cleaved Caspase 7

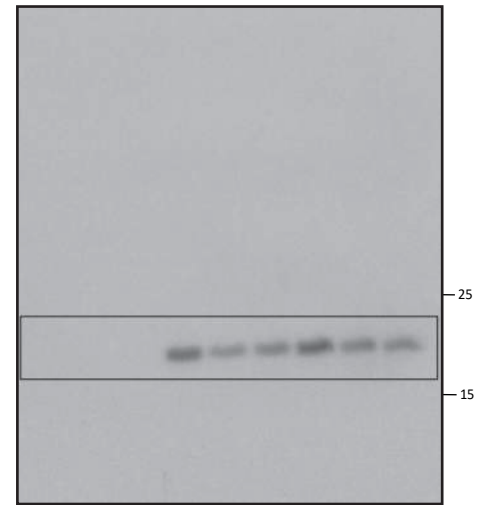

Cleaved Caspase 3

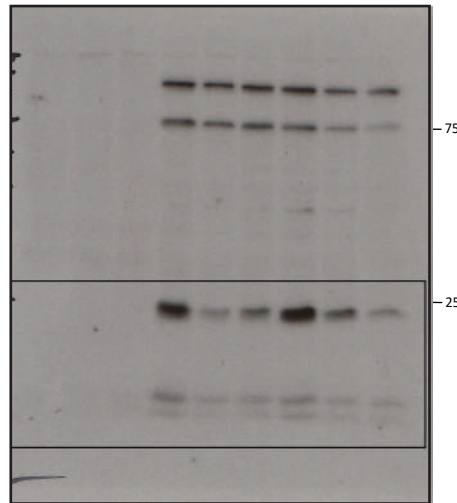

GAPDH

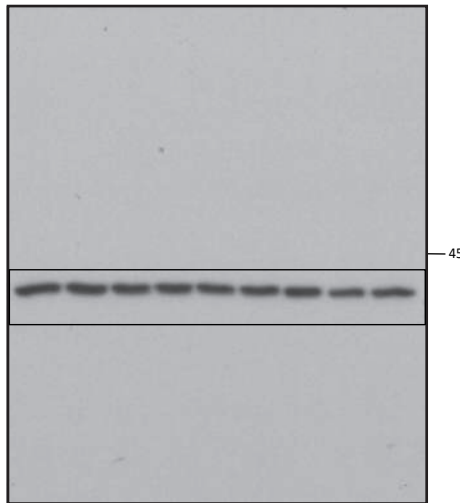

Full length immunoblots from Fig 2c

Caspase 8

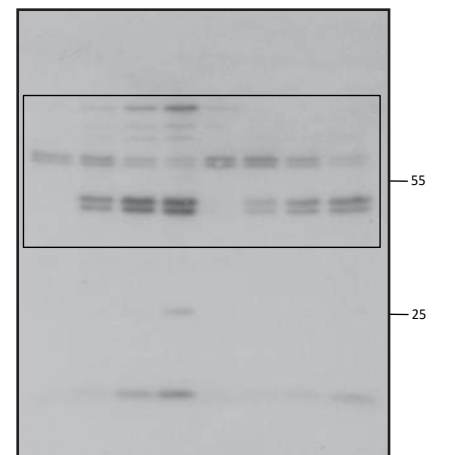

Cleaved Caspase 7

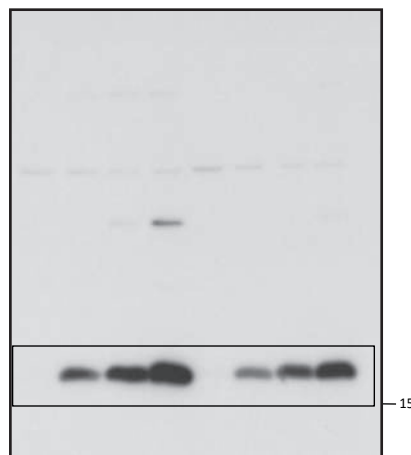

Caspase 9

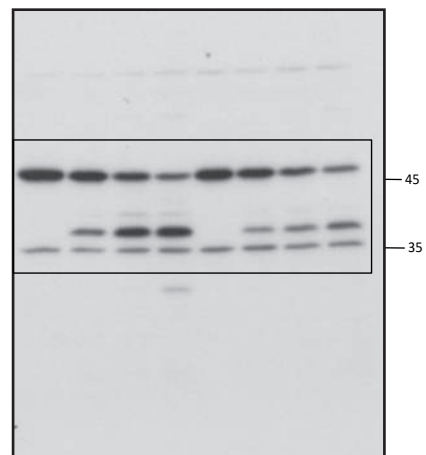

**Cleaved Caspase 3**

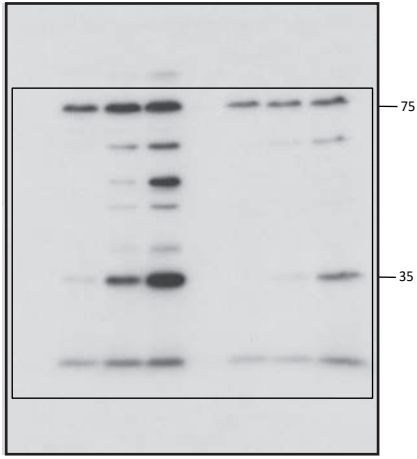

**GAPDH**

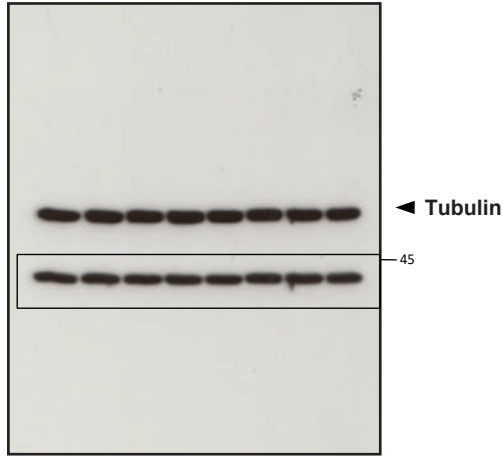

**Full length immunoblots from Fig 3d**

**p-IRF3**

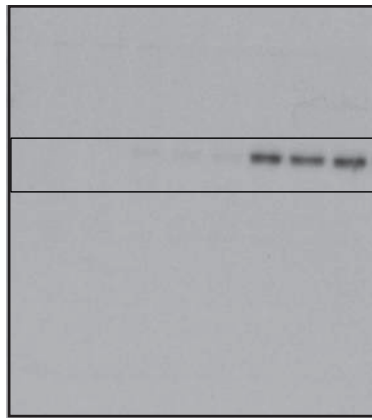

**p-IRF3  
(long.exp.)**

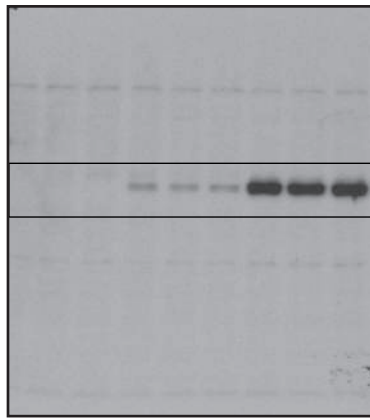

**IRF3**

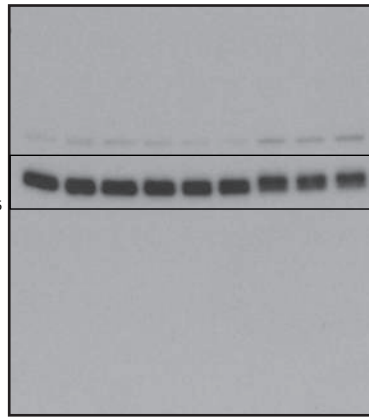

**p-STAT1**

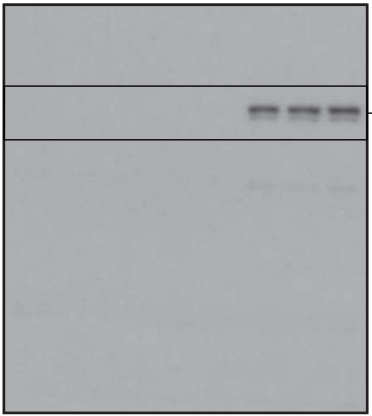

**p-STAT1  
(long.exp.)**

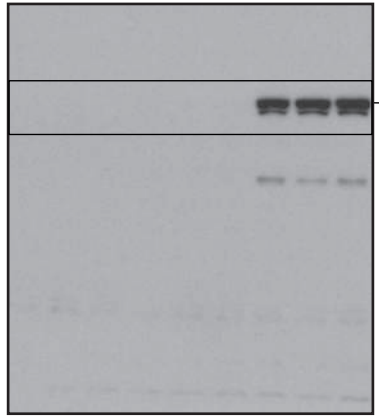

**STAT1**

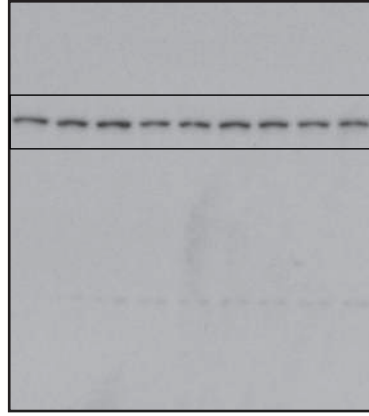

**p-p65**

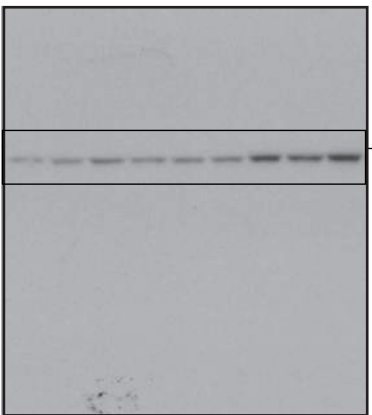

**p65**

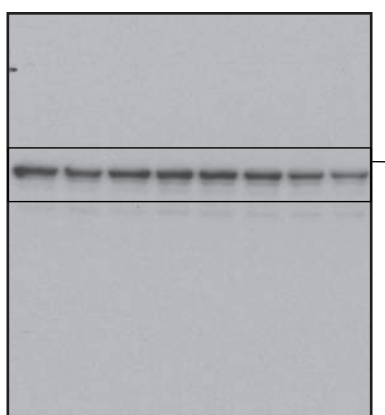

**GAPDH**

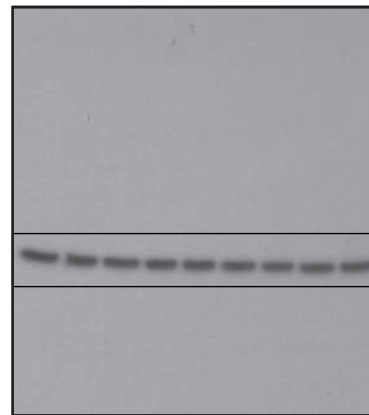

Full length immunoblots from Fig 3f

VSV\_G

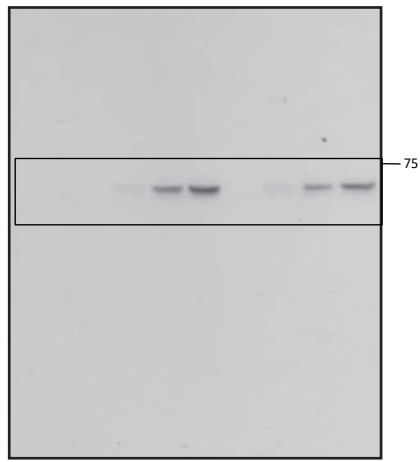

GAPDH

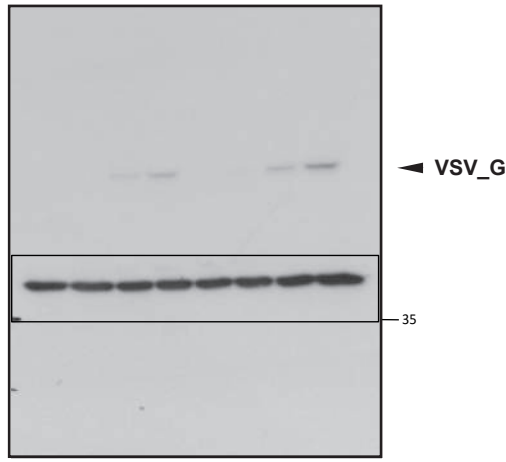

Full length immunoblots from Fig 4b

p-MEK

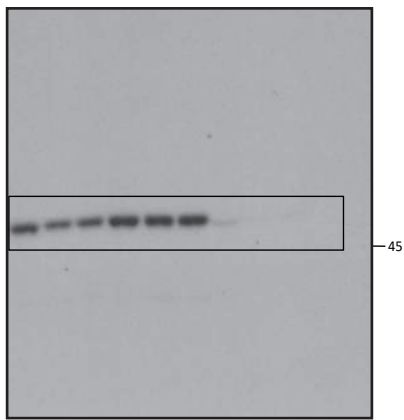

p-MEK  
*(long.exp)*

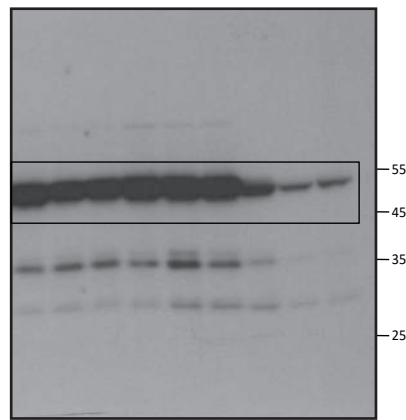

MEK

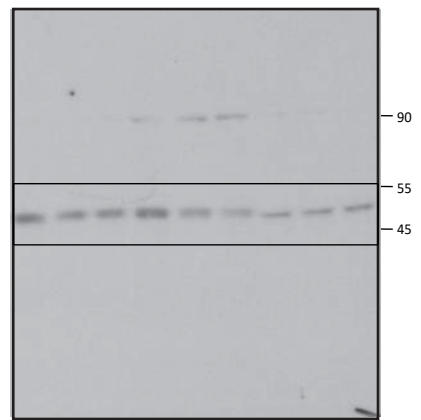

p-ERK

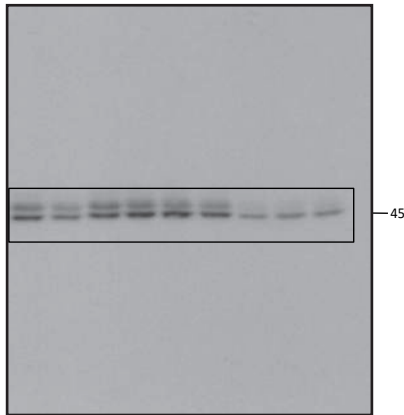

ERK

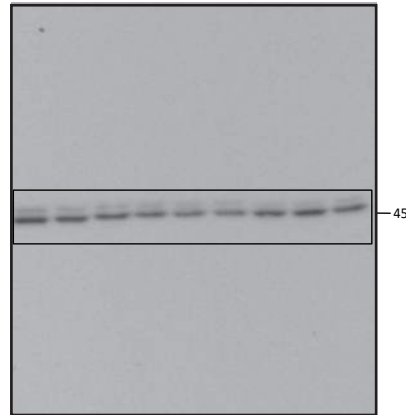

ARF4

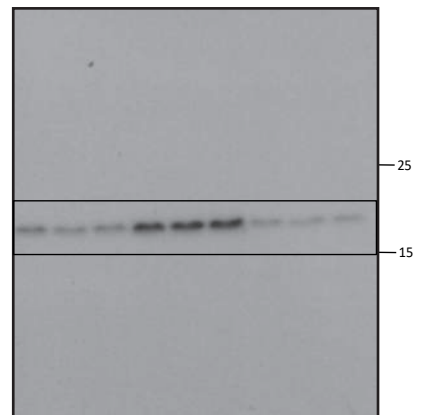

GRP78

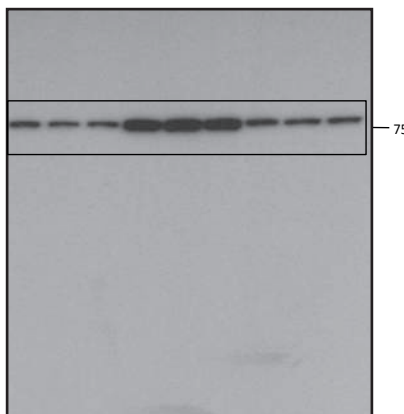

CHOP

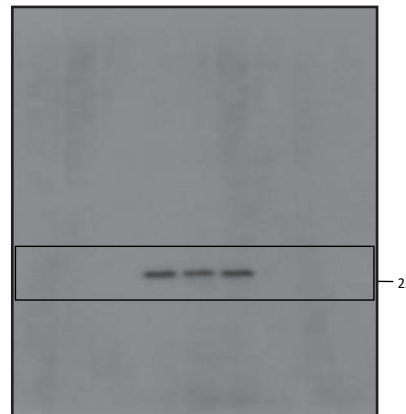

GAPDH

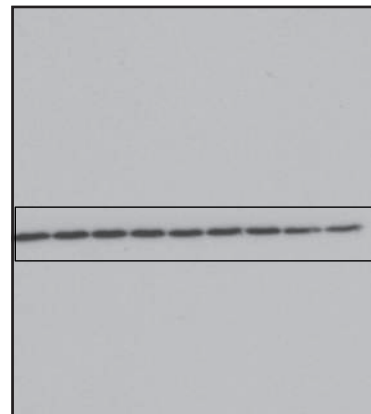

Full length immunoblots from Suppl Fig 2c

V5

GAPDH

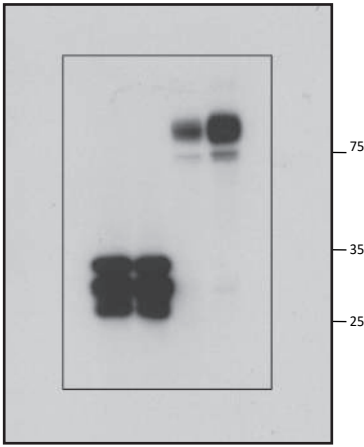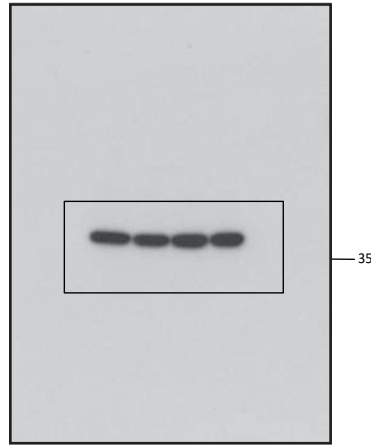

Full length immunoblots from Suppl Fig 3d

Cleaved Caspase 3

Cleaved Caspase 7

GAPDH

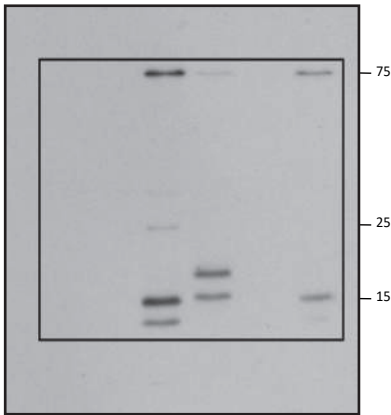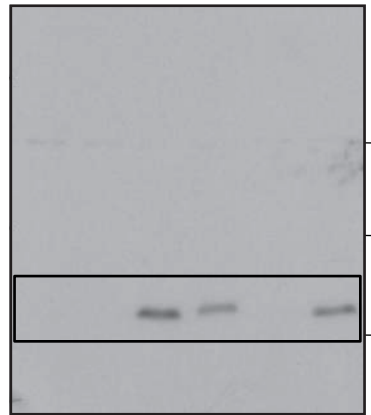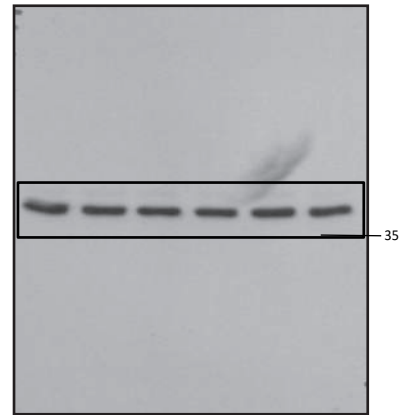

Full length immunoblots from Suppl Fig 4b

Caspase 8

Cleaved Caspase 3

Cleaved Caspase 7

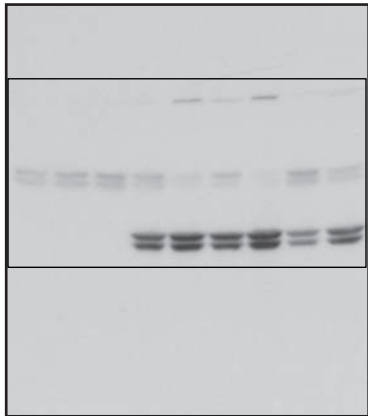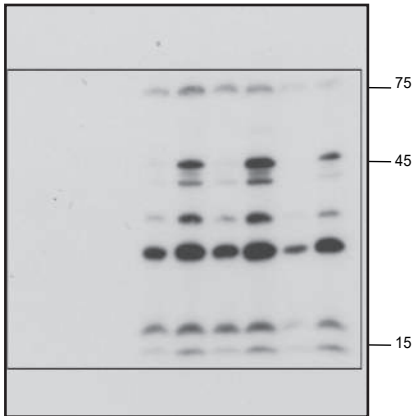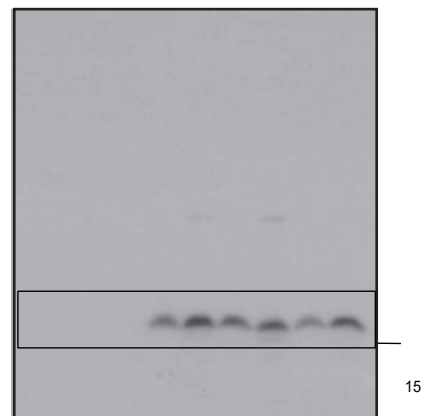

Cleaved Caspase 7  
(long.exp.)

GAPDH

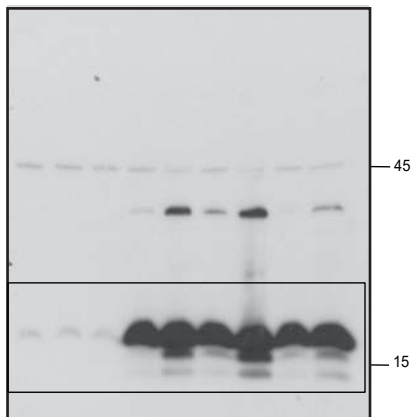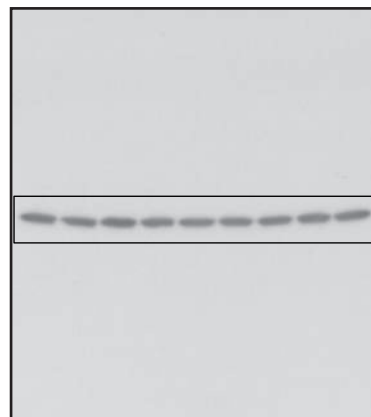

Full length immunoblots from Suppl Fig 4c

V5

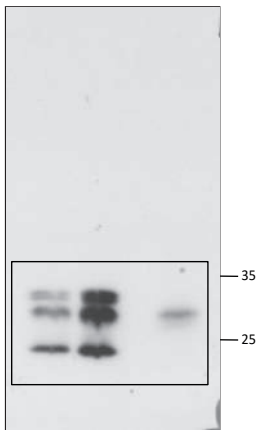

Tubulin

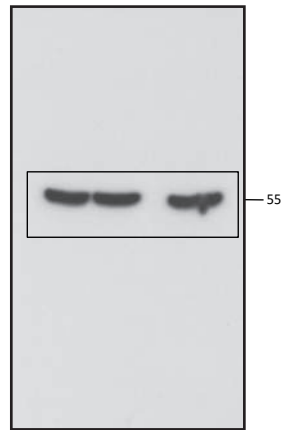



## Supplementary Figures

**Suppl.Fig. 1 Genetic screens for cell survival upon IAV and VSV infection.** **a.** Violin plots of raw and normalized read counts and **b.** Correlation of normalized read counts across biological replicates in the A549 IAV-WSN/1933 screen. **c-e.** Quantification of flow cytometry-based viral replication assay for HAP1 *SLC35A1* (**c**), *SLC35A2* (**d**) knockout cell lines and cells re-expressing *SLC35A1* cDNA (**e**). Cells were infected with IAV-WSN/1933 at MOI 0.01. At 24 h.p.i. the number of the infected cells was assessed after staining with anti-Influenza Nucleoprotein antibody coupled to AF488. **f.** Assessment of A549 cell death upon infection with wild type VSV-GFP (MOI of 10). Cells were incubated for the indicated time points and relative cell number was determined using crystal violet staining. **g.** Violin plots of raw and normalized read counts and **h.** Correlation of normalized read counts across biological replicates in the A549 VSV-GFP screen. **i** and **j** A549 cells expressing sgRNAs targeting *SLC30A1* (**i**) or *SLC35A1* (**j**) were infected with VSV-GFP at MOI of 5 and at the indicated time points stained with LIVE/DEAD cell viability dye. Positive cells were quantified with flow cytometry. Statistical significance was assessed using one-way ANOVA with Dunnett's (**c** and **d**) or two-way ANOVA with Tukey's (**e**) or Dunnett's (**i** and **j**) tests. Unless otherwise indicated, adjusted P-values in relation to to sgRen control are shown. Data are represented as mean  $\pm$  SD of one representative experiment out of at least two independent replicates. \*:  $p \leq 0.05$ ; \*\*:  $p \leq 0.01$ ; \*\*\*:  $p \leq 0.001$ ; ns: not significant.

**Suppl.Fig. 2. SLC30A1 loss results in increased intracellular Zn<sup>2+</sup> concentration and decreased virus-induced cell death.** **a.** Editing efficiency of sgRNAs targeting the *SLC30A1* gene as quantified by the TIDE sequencing method in A549 cells. **b.** Representative FACS histogram and quantification of the A549 *SLC30A1* knockout cells stained with Zn<sup>2+</sup> reactive dye – Zinpyr1. **c.** Representative immunoblot of V5 tagged wild type *SLC30A1* and *SLC30A1*(D254A\_H43A) double mutant cDNA expressing cells. Cropped images are shown for conciseness. Full-length blots are presented in Supplementary Figure 5. **d.** Immunofluorescent image of HAP1 wild type cells overexpressing mScarlet-fused wild type *SLC30A1* and *SLC30A1*(D254A\_H43A) double mutant stained with Zn<sup>2+</sup> reactive fluorescent dye Zinpyr1. **e.** Percentage of apoptotic cells in wild type or *SLC30A1*-deficient HAP1 cells in untransfected (mock) cells or cells transiently transfected with wild type or transport-deficient *SCL30A1* cDNA, upon infection with VSV (MOI 2), as measured with AnnexinV-AF647. Transiently transfected cells (mScarlet<sup>+</sup>) were compared to the equivalent (mScarlet<sup>-</sup>, mock) non-transfected cells. **f.** Intracellular Zn<sup>2+</sup> levels determined using Zinpyr1 fluorescent dye in mock transiently transfected HAP1 cells. Experiment performed once. **g.** Immunofluorescent image of HAP1 wild type cells or HAP1 *SLC30A1*-deficient clone overexpressing mScarlet-fused wild type *SLC30A1* and *SLC30A1*(D254A\_H43A) double mutant. Statistical significance was assessed using two-tailed unpaired Student's t-test (**b**), two-way ANOVA with Sidak's correction (**e**) or one-way ANOVA with Tukey's test (**f**). Unless indicated otherwise P-values in relation to sgRen control (**b**) or

adjusted P-values in relation to mock transfected HAP1wt (**e** and **f**) cells are shown. Data are represented as mean  $\pm$  SD of one representative experiment out of at least two independent replicates. \*:  $p \leq 0.05$ ; \*\*:  $p \leq 0.01$ ; \*\*\*:  $p \leq 0.001$ ; ns: not significant.

**Suppl.Fig. 3. SLC30A1 in apoptosis and VSV infectivity.** **a.** Editing efficiency of sgRNAs targeting the *SLC30A1* gene as quantified by the TIDE sequencing method in HAP1 cells. **b.** Flow cytometry-based VSV-GFP virus replication in *SLC30A1* knockout HEK293T cells (MOI 0.001). **c.** VSV-GFP virus replication in *SLC30A1* knockout HAP1 cells treated with caspase inhibitor z-VAD and infected at MOI of 0.001. The number of GFP<sup>+</sup> cells was quantified with flow cytometry at 14 h.p.i. **d.** Immunoblot analysis of caspase 3 and 7 cleavage in HAP1wt cells stimulated with zVAD and *SLC30A1* knockout clone upon infection with VSV-GFP (MOI 2). Cropped images are shown for conciseness. Full-length blots are presented in Supplementary Figure 5. **d.** VSV- $\Delta$ 51-GFP virus replication in the HAP1 *SLC30A1* knockout and wild type cells infected with MOI 0.001 and 0.005 for 14 hours. Statistical significance was assessed using one-way ANOVA with Dunnett's test (**b** and **c**) or two-way ANOVA with Sidak's correction (**e**). Unless otherwise indicated, adjusted P-values in relation to sgRen control or HAP1wt are shown. Data are represented as mean  $\pm$  SD of one representative experiment out of at least two independent replicates. \*\*:  $p \leq 0.01$ ; \*\*\*:  $p \leq 0.001$ ; ns: not significant.

**Suppl.Fig. 4. SLC35A1 in apoptosis and VSV infectivity.** **a.** Editing efficiency of sgRNAs targeting *SLC35A1* gene as quantified using the TIDE sequencing method in HAP1 and A549 cells. **b.** Pro-apoptotic caspases activation of VSV infected HAP1 *SLC35A1* knockout cells and *SLC35A1* cDNA-expressing cells. Cropped images are shown for conciseness. Full-length blots are presented in Supplementary Figure 5. **c.** Representative immunoblot of HAP1 cells expressing V5-tagged wild type *SLC35A1*. Cropped images are shown for conciseness. Full-length blots are presented in Supplementary Figure 5. **d.** Percentage of apoptotic (AnnexinV<sup>+</sup>) and necrotic (AnnexinV<sup>+</sup>/PI<sup>+</sup>) cells in the HAP1 cell line expressing sgRNAs against *SLC35A1* and *Renilla luciferase* and stimulation with Brefeldin A (12 $\mu$ g/ml), Carfilzomib (4 $\mu$ M) and Camptothecin (2 $\mu$ M) for 8 hours. **e.** Flow cytometry based VSV-GFP virus replication in *SLC35A1* knockout HEK293T cells (MOI 0.001). Statistical significance was assessed using one-way ANOVA with Tukey's (**d** and **f**) or Dunnett's (**e**) tests. Unless otherwise indicated, adjusted P-values in relation to sgRen control are shown. Data are represented as mean  $\pm$  SD of one representative experiment out of at least two independent replicates. \*\*:  $p \leq 0.01$ ; \*\*\*:  $p \leq 0.001$ ; ns: not significant.

**Suppl.Fig. 5. Full blots used in this study.**

## Tables

- **Suppl Table1:** Guide RNA read count tables from SLC knockout screens
- **Suppl Table2:** Primers (qPCR, sequencing) and sgRNAs used in the study
